# Supplementary material for: Lysozyme-stabilized bimetallic gold/silver nanoclusters as a turn-on fluorescent probe for determination of ascorbic acid and acid phosphatase
Source: Royal Society of Chemistry journal article supplement (doi:10.1039/c7ay02372c), 2017-01-01
Supplement: c7ay02372c1.pdf [file c7ay02372c1.pdf]

## Lysozyme-stabilized bimetallic gold/silver nanoclusters as a turn on fluorescent probe for determination of ascorbic acid and acid phosphatase

Shu Pang<sup>†a\*</sup> and Siyu Liu<sup>†b\*</sup>

\*Corresponding author

<sup>a</sup>College of chemistry, chemical engineering and environmental engineering, Liaoning Shihua University, Fushun 113001, China. Email: Pangshu@lnpu.edu.cn.

<sup>b</sup>College of Life and Health Sciences, Northeastern University, Shenyang 110000, China.

<sup>†</sup>These authors contributed equally to this work.

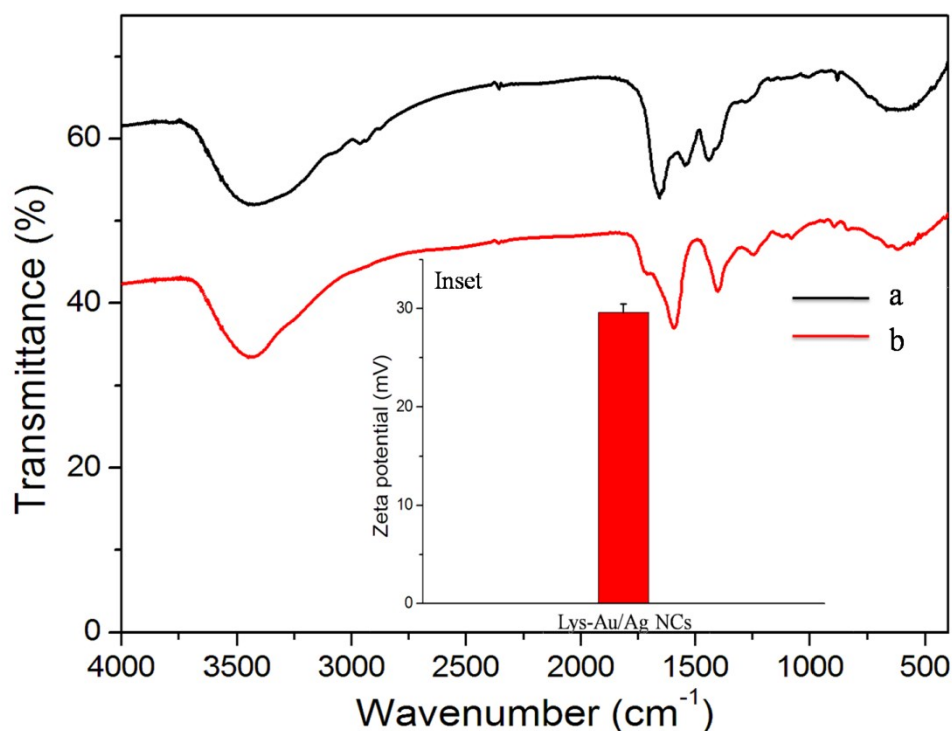

**Fig.S1** FT-IR of the free template lysozyme (curve a) and Lys-Au/Ag NCs (curve b) Inset: Zeta potential measurement of Lys-Au/Ag NCs solution.

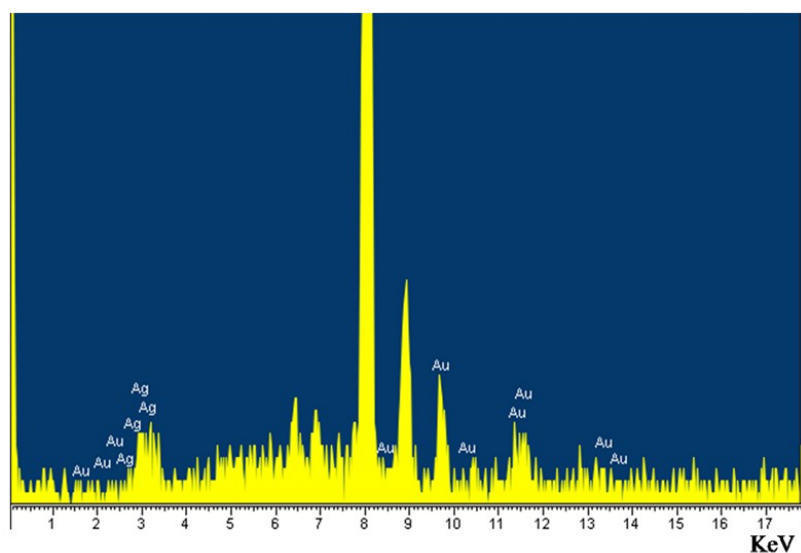

**Fig.S2** EDX spectrum collected for as-prepared Lys-Au/Ag NCs.

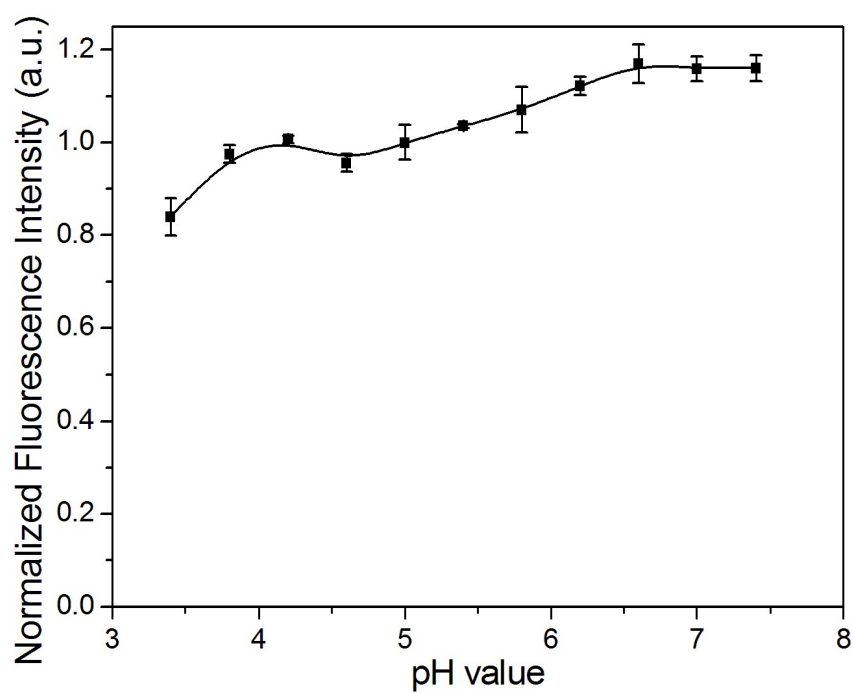

**Fig.S3** The fluorescence emission intensity of Lys-Au/Ag NCs in different pH environments incubated for 30 minutes.

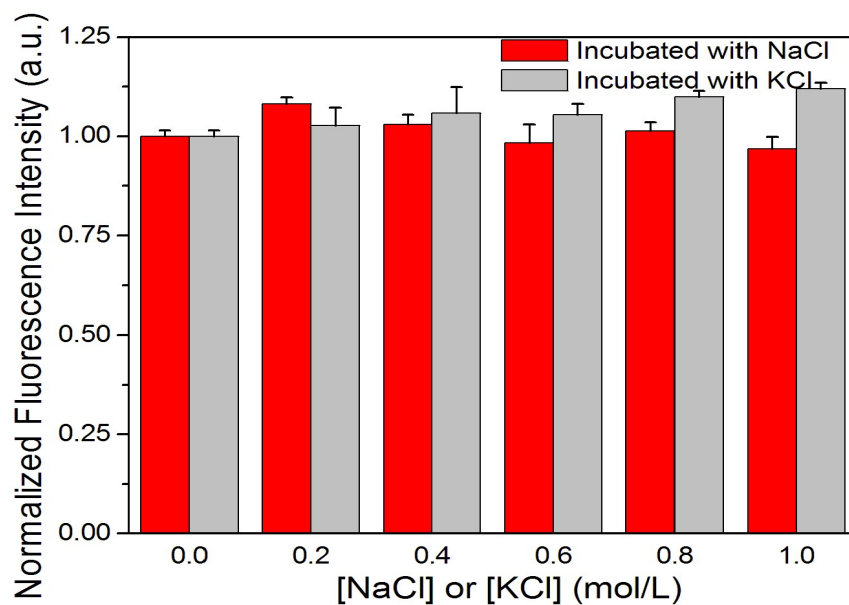

**Fig.S4** The fluorescence emission intensity of Lys-Au/Ag NCs incubated with various NaCl or KCl concentrations for 30 minutes. (10 mmol/L citrate-citric acid buffer solution pH 5.0)

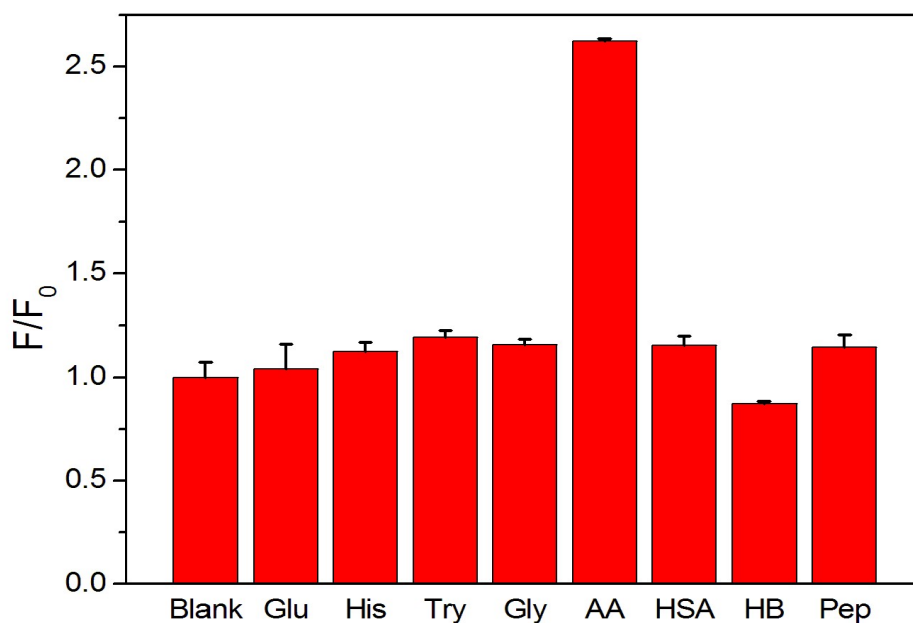

**Fig.S5** The fluorescence emission intensity of Lys-Au/Ag NCs in the presence of various kinds of biomolecules (200  $\mu$ mol/L Glu, His, Try, Gly, 100  $\mu$ mol/L AA, 0.4 mg/mL HAS, HB or Pep). (10 mmol/L citrate-citric acid buffer solution pH 5.0)

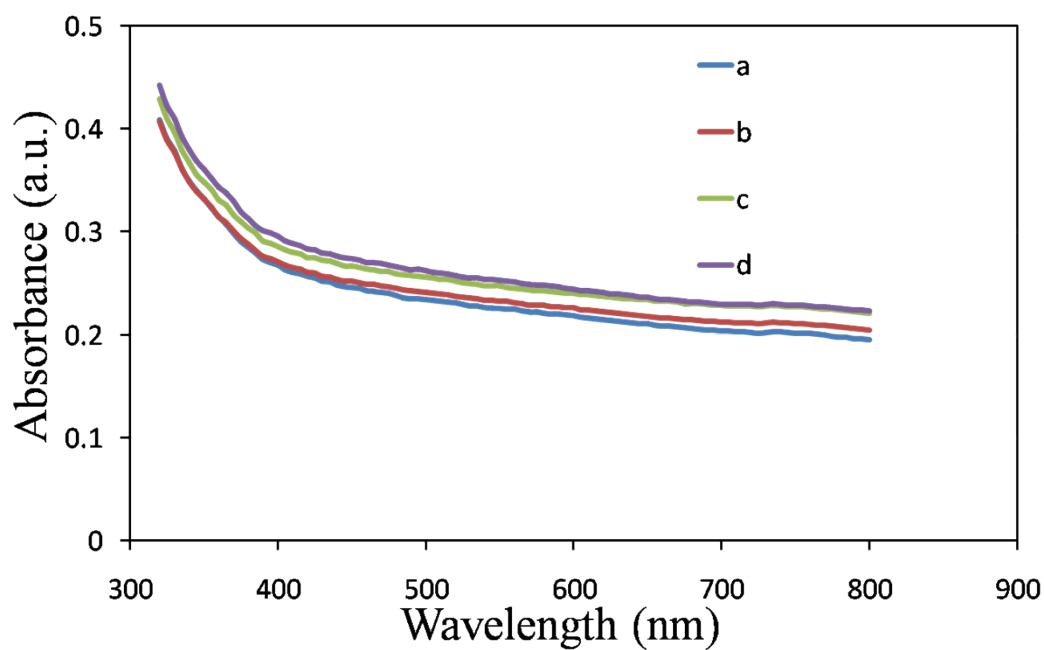

**Fig.S6** The UV-Vis absorption spectra of Lys-Au/Ag NCs respectively incubated with 0  $\mu\text{mol/L}$ (curve a), 50  $\mu\text{mol/L}$ (curve b), 100  $\mu\text{mol/L}$  (curve c) or 200  $\mu\text{mol/L}$  AA (curve d) for 10 minutes.

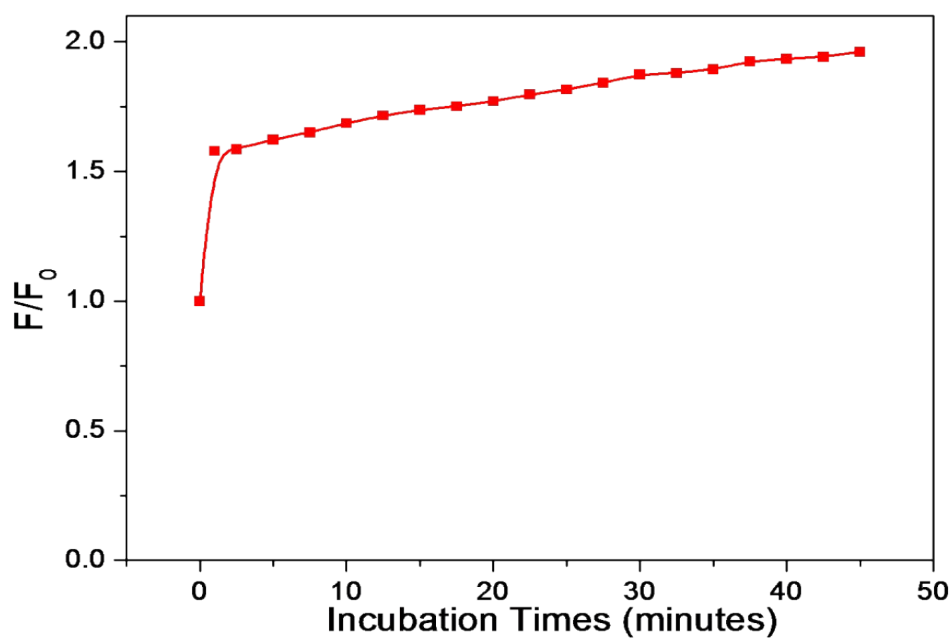

**Fig.S7** The temporal evolution of fluorescence emission intensity of Lys-Au/Ag NCs incubated with of 500  $\mu\text{mol/L}$  PAA and 10  $\mu\text{g/mL}$  ACP.

**Table S1** Performance comparison of various fluorescent sensors for AA detection

| Fluorophore                           | Sensing system                           | Dynamic range               | Detection limit         | Reference   |
|---------------------------------------|------------------------------------------|-----------------------------|-------------------------|-------------|
| Carbon quantum dot                    | Turn off-on/<br>Cr(VI)ions-AA            | 5-200 $\mu\text{mol/L}$     | 1.35 $\mu\text{mol/L}$  | 33          |
| Carbon dots                           | Turn off/<br>$\text{Cu}^{2+}$ ions-AA    | 0.057-4.0 $\mu\text{mol/L}$ | 18 nmol/L               | 34          |
| Graphitic carbon nitride nanosheets   | Turn off-on/<br>Cr(VI)ions-AA            | 0.6-300 $\mu\text{mol/L}$   | 0.15 $\mu\text{mol/L}$  | 35          |
| Carbon dots                           | Turn off/<br>$\text{Fe}^{3+}$ ions-AA    | 24-40 $\mu\text{g/mL}$      | –                       | 36          |
| Carbon quantum dots /AuNCs nanohybrid | Turn off-on/<br>$\text{Cd}^{2+}$ ions-AA | 0.15-15 $\mu\text{mol/L}$   | 0.105 $\mu\text{mol/L}$ | 37          |
| Silver/carbon nanohybrid              | Turn off-on/<br>$\text{Fe}^{3+}$ ions-AA | 0.2-60 $\mu\text{mol/L}$    | 25 nmol/L               | 38          |
| Gold nanoclusters                     | Turn off-on/<br>$\text{I}^-$ ions-AA     | 0.1-10 $\mu\text{mol/L}$    | 22 nmol/L               | 39          |
| Au nanoclusters -PbS quantum dot      | Turn off/<br>AA-quenching                | 3-40 $\mu\text{mol/L}$      | 1.5 $\mu\text{mol/L}$   | 40          |
| CdTe quantum dot                      | Turn off-on/<br>4-AP-AA                  | 0.022-0.44mmol/L            | 4.33 $\mu\text{mol/L}$  | 41          |
| Lyz-Au nanoclusters                   | Turn-on/<br>AA-enhancing                 | 0.2-200 $\mu\text{mol/L}$   | 0.12 $\mu\text{mol/L}$  | This method |

**Table S2** Performance comparison of various fluorescent sensors for ACP detection

| Fluorophores                    | Sensing systems                                                            | Dynamic range  | Detection limit | Reference   |
|---------------------------------|----------------------------------------------------------------------------|----------------|-----------------|-------------|
| CuInS <sub>2</sub> quantum dots | Turn off-on-off/<br>$\text{Cu}^{2+}$ -ATP-ACP                              | 6.4-192 nU/ mL | 3.1nU/mL        | 24          |
| Carbon quantum dots             | Turn off-on-off/<br>$\text{Ni}^{2+}$ -pyrophosphate-ACP                    | 18.2-1300 U/L  | 5.5 U/L         | 25          |
| Gold nanoclusters               | Turn off-on-off/<br>$\text{Fe}^{3+}$ -pyrophosphate-ACP                    | 1-30 nmol/L    | 1 nmol/L        | 26          |
| Copper nanoclusters             | Turn on-off/<br>pH-Fe(III) pyrophosphate (FePPi <sub>2</sub> ) complex-ACP | 3.1-100 U/L    | 0.8 U/L         | 27          |
| Anionic polymer                 | Turn off-on-off/<br>$\text{Fe}^{3+}$ -pyrophosphate-ACP                    | 4-28 nmol/L    | –               | 28          |
| Lyz-Au/Ag NCs                   | Turn-on/<br>PAA-ACP                                                        | 100-12500ng/mL | 53ng/mL         | This method |

**Table S3** Determination of ACP in fetal bovine serum samples according to equation (2)

| Serum samples | Added ACP<br>(ng/mL) | Detected ACP<br>(ng/mL) | Recovery<br>(%) | RSD<br>(n=3, %) |
|---------------|----------------------|-------------------------|-----------------|-----------------|
| 1             | 100                  | 94                      | 94              | 4.8             |
| 2             | 500                  | 532                     | 106             | 3.9             |
